# Supplementary material
Source: PubMed Central journal article supplement (PMC3143500)
Supplement: NIHMS294547-supplement-01.pdf [file NIHMS294547-supplement-01.pdf]

## **Structural Requirements for the Inhibition of Calcium Mobilization and Mast Cell Activation by the Pyrazole Derivative BTP2**

**Mankit Law<sup>1,2,4</sup>, J. Luis Morales<sup>1</sup>, Laurie F. Mottram<sup>3</sup>, Archana Iyer<sup>1,2,#</sup>, Blake R. Peterson<sup>3,†</sup>, and Avery August<sup>1,2,4,\*</sup>**

<sup>1</sup>Center for Molecular Immunology and Infectious Disease, Department of Veterinary and Biomedical Sciences, <sup>2</sup>Huck Institutes of the Life Sciences, Immunology and Infectious Diseases Graduate Program, <sup>3</sup>Department of Chemistry, The Pennsylvania State University, University Park, PA 16802, USA, <sup>4</sup>Department of Microbiology & Immunology, Cornell University, Ithaca, NY, USA.

**Running title:** SAR of BTP for mast cell degranulation

<sup>#</sup>Present Address: Joint Centers for Systems Biology, Columbia University, 1130 St. Nicholas Avenue, New York, NY 10032, USA.

<sup>††</sup>Present Address: Department of Medicinal Chemistry, University of Kansas, 1251 Wescoe Hall Drive, 4070 Malott Hall, Lawrence, Kansas 66045-7582, USA

\*Correspondence at current address: Avery August, Department of Microbiology & Immunology, College of Veterinary Medicine, VMC 5117, Cornell University, Ithaca, NY, 14853-6401, USA. (607) 253-3401 (Ofc), (607) 253-4058 (Fax), email: [averyaugust@cornell.edu](mailto:averyaugust@cornell.edu)

**Supplemental Material**

## Figure Legend

**Supplementary Figure 1. BTP2 inhibits mast cell degranulation and release of  $\beta$ -hexosaminidase *in vitro*.** RBL-2H3 cells were stimulated for 1 hour with ionomycin (500 nM) following pre-treatment with BTP2 (1  $\mu$ M) or vehicle (DMSO) for 1 hr. After stimulation, cells were lysed with 1% Triton-X, and the extracts were analyzed for their  $\beta$ -hexosaminidase activities (total - test).  $\beta$ -hexosaminidase activity in unstimulated cells (spontaneous) was subtracted from the enzyme activity from stimulated cells (test). **(A)** Data expressed as a percent of ionomycin induced release. **(B)** Data expressed as a percentage of total  $\beta$ -hexosaminidase released into the supernatant. This was calculated using the following formula:  $\text{release (\% of total)} = ((\text{test} - \text{spontaneous}) / (\text{total} - \text{spontaneous})) \times 100$ . Data are expressed as the mean  $\pm$  SEM of 3 independent experiments. \*\*\*,  $P < 0.001$  vs. Vehicle.

**A)**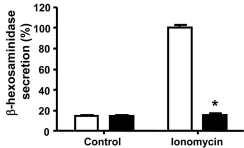**B)**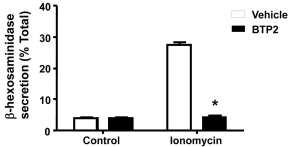**Supplemental Figure 1**
